# Supplementary material for: Big opportunities for small molecules in immuno-oncology
Source: Springer Nature journal article supplement (doi:10.1038/nrd4596), 2015-07-31
Supplement: 41573_2015_BFnrd4596_MOESM6_ESM.pdf [file 41573_2015_BFnrd4596_MOESM6_ESM.pdf]

Table S1: Combination Immunotherapy: Small Molecules that Boost Immune Response in Combination with Other Agents

| Target            | Compound (MOA)                   | Combination                | Model                                        | Observation                                                                                                 | Reference                       |
|-------------------|----------------------------------|----------------------------|----------------------------------------------|-------------------------------------------------------------------------------------------------------------|---------------------------------|
| IDO1              | NLG919 and indoximod (inhibitor) | Anti-PD-1/PD-L1/PD-L2 mAbs | Murine B16 F10 melanoma                      | Synergistic compared with single checkpoint inhibition                                                      | Mautino, 2014 <sup>1</sup>      |
| IDO1              | 1-MT (inhibitor)                 | Anti-CTLA4, PD-L1          | Murine glioma                                | Combination blockade targets Tregs and enhances survival from established glioma                            | Wainwright, 2014 <sup>2</sup>   |
| IDO1              | 1-MT, IDO1 (knockdown)           | Anti-CTLA4, PD-L1          | Syngeneic murine B16 F10 melanoma            | Synergistic efficacy, delayed tumor growth and prolonged survival                                           | Holmgaard, 2014 <sup>3</sup>    |
| IDO1              | Imatinib (inhibitor)             | Anti-CTLA4 mAb             | Transgenic GIST murine (KitV558+)            | Reduced tumor volume relative to imatinib single agent, not curative                                        | Balachandran, 2011 <sup>4</sup> |
| A <sub>2A</sub> R | SCH58261 (antagonist)            | Anti-PD-1 mAb              | B16-F10 melanoma and 4T1.2 mammary carcinoma | Combination significantly reduces metastatic burden and prolongs the life of mice compared with monotherapy | Mittal, 2014 <sup>5</sup>       |
| A <sub>2A</sub> R | ZM241365 (antagonist)            | Anti-CTLA4                 | Syngeneic murine B16 F10 melanoma            | Combination inhibited tumor growth and enhanced antitumor immune responses                                  | Iannone, 2014 <sup>6</sup>      |
| CD73              | AMPCP (inhibitor)                | Anti-CTLA4 mAb             | Syngeneic murine B16 F10 melanoma            | Combination significantly reduces metastatic burden and delays tumor growth                                 | Iannone, 2014 <sup>6</sup>      |
| CD73              | AMPCP (inhibitor)                | Adoptive T-cell therapy    | Murine B16-SIY melanoma                      | AMPCP but not adoptive therapy slowed tumor growth; combination resulted in tumor regression                | Wang, 2011 <sup>7</sup>         |

|      |                      |                               |                                                                            |                                                                                                                                                    |                              |
|------|----------------------|-------------------------------|----------------------------------------------------------------------------|----------------------------------------------------------------------------------------------------------------------------------------------------|------------------------------|
| CD73 | CD73 mAb (inhibitor) | Anti-PD-1 and anti-CTLA4 mAbs | MC38-OVA (colon) RM-1 (prostate) and 4T1.2 (breast)                        | Combination of CD73 mAb significantly enhanced the activity of both anti-CTLA4 and anti-PD1                                                        | Allard, 2013 <sup>8</sup>    |
| TLR3 | Poly-IC (agonist)    | Anti-PD-L1 mAb                | Murine B16F10 melanoma, lung (LLC)-A9F1 and MC38 colorectal adenocarcinoma | Combination resulted insignificant reduction or complete eradication of tumor; mice resistant to rechallenge                                       | Nagato, 2014 <sup>9</sup>    |
| TLR7 | R848 (agonist)       | Radiation                     | Murine syngeneic T and B cell lymphoma                                     | Longstanding clearance of tumor; cured mice resistant to rechallenge                                                                               | Dovedi, 2013 <sup>10</sup>   |
| TLR7 | Imiquimod (agonist)  | IDO1 inhibitor (1-MT)         | Murine colon carcinoma CT26                                                | Combination therapy with imiquimod and 1-MT significantly inhibited tumor growth                                                                   | Ito, 2014 <sup>11</sup>      |
| TLR9 | CpG 1826 (agonist)   | Anti-CTLA4 and anti-OX40      | Murine A20 lymphoma                                                        | Each antibody alone enhanced efficacy of CpG1826; combination with both mAbs resulted in tumor clearance; mice resistant to tumor upon rechallenge | Houot, 2009 <sup>12</sup>    |
| TLR9 | CpG (agonist)        | Anti-PD-1 and anti-CTLA4 mAbs | Murine experimental bladder cancer                                         | Combination of CpG with CTLA-4 or PD-1 blockade improved long-term survival and led to increased Teffs and decreased Tregs at the tumor site       | Mangsbo <sup>13</sup> , 2010 |
| TRL9 | CpG ODN (agonist)    | TLR7/8 agonist (3M-052)       | CT26 colon carcinoma, syngeneic murine tumor                               | Increased activity of immune infiltrate; combinatorial efficacy eradicated primary tumors and established protective immunity                      | Zhao, 2014 <sup>14</sup>     |
| TLR9 | C792 (agonist)       | Bortezomib                    | Murine xenograft model of human MM and <i>ex vivo</i>                      | Improved immune function and overcome drug resistance                                                                                              | Ray, 2014 <sup>15</sup>      |

|         |                         |                               |                                                |                                                                                                                                                |                              |
|---------|-------------------------|-------------------------------|------------------------------------------------|------------------------------------------------------------------------------------------------------------------------------------------------|------------------------------|
| TLR 3/9 | Poly(I:C)/CpG (agonist) | Adoptive T cell therapy       | Syngeneic murine B16 F10 melanoma              | TLR agonist enhanced IFN-g production by adoptively transferred T cells resulting in enhanced tumor immunogenicity and increased tumor killing | Amos, 2011 <sup>16</sup>     |
| CXCR2   | Anti-CXCR2 mAb          | Anti-PD-1 mAb                 | Rhabdomyosarcoma tumor                         | Reduced MDSC infiltration                                                                                                                      | Highfill, 2014 <sup>17</sup> |
| CXCR4   | Plerixafor (AMD3100)    | Anti-PD-1 and anti-CTLA4 mAbs | KPC model of pancreatic ductal carcinoma       | Checkpoint blockers had no effect as single agents, but in combination with plerixafor anti-PD-1 (but not anti-CTLA4) decreased tumor volume   | Feig, 2013 <sup>18</sup>     |
| BRAF    | Vemurafenib (inhibitor) | Anti-PD-1 and anti-PDL1 mAb   | Murine syngeneic BRAF(V600E)/Pten-/- tumor     | Combination significantly prolonging survival and slowed tumor growth; increased number and activity of TILs                                   | Cooper, 2014 <sup>19</sup>   |
| CSF-1   | PLX3397 (inhibitor)     | Anti-PD-1 and anti-CTLA4 mAbs | Murine pancreatic ductal adenocarcinoma (PDAC) | Checkpoint blockers had no effect as single agents, but in combination with CSF-1R blocker elicited tumor regressions                          | Zhu, 2014 <sup>20</sup>      |

Footnotes: Abbreviations

1-MT, 1-methyltryptophan; CTLA-4, cytotoxic T lymphocyte-associated antigen-4; PD-1, programmed cell death protein-1; PD-L1, programmed death-ligand (also known as B7 homolog 1 [B7-H1]), AMPCP, adenosine 5'-( $\alpha,\beta$ -methylene)diphosphate

#### Legend

Many pre-clinical studies have demonstrated significant, even synergistic, value in combining immune-stimulating SMDs with other therapies. IDO-1 inhibitors have been studied in combination with surrogate T cell checkpoint modulating mAbs to CTLA-4, PD-1, and GITR. In each case, both efficacy and related PD aspects of improved immune activity/function were observed in these studies across a variety of murine models.<sup>1-4</sup> The combination of CD73 inhibitors or receptor  $A_{2A}$  pathway antagonists (SMDs or surrogate mAbs) with either PD-1 or CTLA-4 inhibitory surrogate mAbs consistently results in improved efficacy.<sup>5-8</sup> TLR agonists have been studied extensively pre-clinically and clinically, albeit usually in the context of a vaccine approach with an adjuvant function. In light of the compensatory mechanisms that are engaged to regulate the immune response to TLR agonist, interest has now shifted to combinations of TLR with other agents that will counteract these immuno-

suppressive mechanisms. Several recent reports in murine syngeneic tumor models highlight additional value of TLR agonist in direct combination with other immune-modulating agents including anti PD1L-1 and CTLA4 mAbs and agonist OX40 mAbs<sup>9, 12, 13</sup> or in concert with adoptive T-cell therapy.<sup>16</sup> In these models the combination therapies often result in total clearance of tumors and the “cured” animals are resistant to re-introduction of the tumor. Other reported studies with TLR agonists include combinations with other TLR agonists, IDO-1 inhibitors or radiation and report not only improved (sometimes curative) efficacy in murine models but also demonstrate significant improvements in immune tumor infiltration and activation of T cell function.<sup>10, 11, 14</sup> Emerging evidence also suggests that combining TLR agonists with SoC such as bortezomib for multiple myeloma can result in improved immune function and even overcome drug resistance during treatment.<sup>15</sup> Chemokine antagonists also provide improved efficacy when used with anti-PD-1 mAbs, presumably by blocking access of MDSCs (CXCR2) or by enhancing access of T effector cells (CXCR4) to the TME.<sup>17, 18</sup> Following the recent success of experimental medicines targeting PD-1 & PDL1, pre-clinical<sup>19, 20</sup> and clinical combination studies (Table S2) are underway with signal transduction inhibitors with the expectation of additional immune-activation via their tumor cell killing activity. In summary the combined evidence across both syngeneic and tumor xenograft models provides compelling confidence to enable rational clinical trial design for experimental medicine combination treatments.

## References

1. M. Mautino, C.J.L., N. Vahanian, J. Adams, C. Van Allen, M. D. Sharma, T. S. Johnson and D.H. Munn. Synergistic antitumor effects of combinatorial immune checkpoint inhibition with anti-PD-1/PD-L antibodies and the IDO pathway inhibitors NLG919 and indoximod in the context of active immunotherapy. *April 2014 AACR Meeting Poster # 5023* (2014).
2. Wainwright, D.A. et al. Durable therapeutic efficacy utilizing combinatorial blockade against IDO, CTLA-4, and PD-L1 in mice with brain tumors. *Clinical Cancer Research* **20**, 5290-5301 (2014).
3. Holmgaard, R.B., Zamarin, D., Munn, D.H., Wolchok, J.D. & Allison, J.P. Indoleamine 2,3-dioxygenase is a critical resistance mechanism in antitumor T cell immunotherapy targeting CTLA-4. *Journal of Experimental Medicine* **210**, 1389-1402 (2013).
4. Balachandran, V.P. et al. Imatinib potentiates antitumor T cell responses in gastrointestinal stromal tumor through the inhibition of IDO. *Nature Medicine* **17**, 1094-1100 (2011).
5. Mittal, D. et al. Antimetastatic effects of blocking PD-1 and the adenosine A2A receptor. *Cancer Research* **74**, 3652-3658 (2014).
6. Iannone, R., Miele, L., Maiolino, P., Pinto, A. & Morello, S. Adenosine limits the therapeutic effectiveness of anti-CTLA4 mAb in a mouse melanoma model. *Am J Cancer Res* **4**, 172-81 (2014).
7. Wang, L. et al. CD73 has distinct roles in nonhematopoietic and hematopoietic cells to promote tumor growth in mice. *Journal of Clinical Investigation* **121**, 2371-2382 (2011).
8. Allard, B., Pommey, S., Smyth, M.J. & Stagg, J. Targeting CD73 enhances the antitumor activity of anti-PD-1 and anti-CTLA-4 mAbs. *Clinical Cancer Research* **19**, 5626-5635 (2013).

9. Nagato, T. & Celis, E. A novel combinatorial cancer immunotherapy: Poly-IC and blockade of the PD-1/PD-L1 pathway. *OncImmunology* **3** (2014).
10. Dovedi, S.J. et al. Systemic delivery of a TLR7 agonist in combination with radiation primes durable antitumor immune responses in mouse models of lymphoma. *Blood* **121**, 251-259 (2012).
11. Ito, H., Ando, T., Arioka, Y., Saito, K. & Seishima, M. Inhibition of indoleamine 2,3-dioxygenase activity enhances the anti-tumor effects of a TLR7 agonist in an established cancer model. *Immunology*, n/a-n/a (2014).
12. Houot, R. & Levy, R. T-cell modulation combined with intratumoral CpG cures lymphoma in a mouse model without the need for chemotherapy. *Blood* **113**, 3546-3552 (2009).
13. Mangsbo, S.M. et al. Enhanced tumor eradication by combining CTLA-4 or PD-1 blockade with CpG therapy. *Journal of Immunotherapy* **33**, 225-235 (2010).
14. Zhao, B., Vasilakos, J., Tross, D., Smirnov, D. & Klinman, D. Combination therapy targeting toll like receptors 7, 8 and 9 eliminates large established tumors. *Journal for ImmunoTherapy of Cancer* **2**, 12 (2014).
15. Ray, A. et al. A novel TLR-9 agonist C792 inhibits plasmacytoid dendritic cell-induced myeloma cell growth and enhance cytotoxicity of bortezomib. *Leukemia* **28**, 1716-1724 (2014).
16. Amos, S.M. et al. Adoptive immunotherapy combined with intratumoral TLR agonist delivery eradicates established melanoma in mice. *Cancer Immunology, Immunotherapy* **60**, 671-683 (2011).
17. Highfill, S.L. et al. Disruption of CXCR2-mediated MDSC tumor trafficking enhances anti-PD1 efficacy. *Science Translational Medicine* **6** (2014).
18. Feig, C. et al. Targeting CXCL12 from FAP-expressing carcinoma-associated fibroblasts synergizes with anti-PD-L1 immunotherapy in pancreatic cancer. *Proceedings of the National Academy of Sciences of the United States of America* **110**, 20212-20217 (2013).
19. Cooper, Z.A. et al. Response to BRAF inhibition in melanoma is enhanced when combined with immune checkpoint blockade. *Cancer Immunology Research* (2014).
20. Zhu, Y. et al. CSF1/CSF1R blockade reprograms tumor-infiltrating macrophages and improves response to T-cell checkpoint immunotherapy in pancreatic cancer models. *Cancer Research* **74**, 5057-5069 (2014).
