# Supplementary material for: Big opportunities for small molecules in immuno-oncology
Source: Springer Nature journal article supplement (doi:10.1038/nrd4596), 2015-07-31
Supplement: 41573_2015_BFnrd4596_MOESM7_ESM.pdf [file 41573_2015_BFnrd4596_MOESM7_ESM.pdf]

Table S2: Immuno-Modulating SMDs that have Entered Clinical Trials Either as Single-Agent Studies or as Part of a Combination Therapy Exploration.

| Trial Title                                                                                                             | Disease Type(s)                                                                                                       | Trial Phase(s) | Sponsor / Collaborator                                    | Primary SMD(s)   | Primary Immunotherapy Drug Target | Other Drugs                                                       | Trial Status         | Start Date | Reference   |
|-------------------------------------------------------------------------------------------------------------------------|-----------------------------------------------------------------------------------------------------------------------|----------------|-----------------------------------------------------------|------------------|-----------------------------------|-------------------------------------------------------------------|----------------------|------------|-------------|
| 1-Methyl-D-Tryptophan in Treating Patients With Metastatic or Refractory Solid Tumors That Cannot Be Removed By Surgery | Unspecified Adult Solid Tumor, Protocol Specific                                                                      | I              | National Cancer Institute (NCI)                           | Indoximod (1-MT) | IDO1 inhibitor                    |                                                                   | Completed            | Oct-07     | NCT00567931 |
| IDO Inhibitor Study for Relapsed or Refractory Solid Tumors                                                             | Breast Cancer, Lung Cancer, Melanoma, Pancreatic Cancer, Solid Tumors                                                 | I              | NewLink Genetics Corporation                              | Indoximod (1-MT) | IDO1 inhibitor                    |                                                                   | Terminated           | Aug-08     | NCT00739609 |
| Vaccine Therapy and 1-MT in Treating Patients With Metastatic Breast Cancer                                             | Male Breast Cancer, Recurrent Breast Cancer, Stage IV Breast Cancer, Unspecified Adult Solid Tumor, Protocol Specific | I/II           | H. Lee Moffitt Cancer Center and Research Institute   NCI | Indoximod (1-MT) | IDO1 inhibitor                    | Biological: adenovirus-p53 transduced dendritic cell (DC) vaccine | Open, not recruiting | Dec-09     | NCT01042535 |
| 1-Methyl-D-Tryptophan and Docetaxel in Treating Patients With Metastatic Solid Tumors                                   | Unspecified Adult Solid Tumor, Protocol Specific                                                                      | I              | NCI                                                       | Indoximod (1-MT) | IDO1 inhibitor                    | Docetaxel                                                         | Completed            | Sep-10     | NCT01191216 |
| Phase II Study of Sipuleucel-T and Indoximod for Patients With Refractory Metastatic Prostate Cancer                    | Metastatic Prostate Cancer                                                                                            | II             | Masonic Cancer Center, University of Minnesota            | Indoximod (1-MT) | IDO1 inhibitor                    | Sipuleucel-T                                                      | Open                 | Oct-12     | NCT01560923 |
| Study of Chemotherapy in Combination With IDO Inhibitor in Metastatic Breast Cancer                                     | Metastatic Breast Cancer                                                                                              | II             | NewLink Genetics Corporation                              | Indoximod (1-MT) | IDO1 inhibitor                    | Docetaxel                                                         | Open                 | Feb-13     | NCT01792050 |

|                                                                                                                                                                                                                                                                                     |                                                                     |       |                                                                       |                  |                 |                                                                        |           |        |                                                            |
|-------------------------------------------------------------------------------------------------------------------------------------------------------------------------------------------------------------------------------------------------------------------------------------|---------------------------------------------------------------------|-------|-----------------------------------------------------------------------|------------------|-----------------|------------------------------------------------------------------------|-----------|--------|------------------------------------------------------------|
| Study of IDO Inhibitor and Temozolomide for Adult Patients With Primary Malignant Brain Tumors                                                                                                                                                                                      | Glioblastoma Multiforme, Glioma, Gliosarcoma, Malignant Brain Tumor | I/II  | NewLink Genetics Corporation                                          | Indoximod (1-MT) | IDO1 inhibitor  | Temozolomide                                                           | Open      | Mar-14 | NCT02052648                                                |
| Study of IDO Inhibitor in Combination With Ipilimumab for Adult Patients With Metastatic Melanoma                                                                                                                                                                                   | Metastatic Melanoma, Stage III Melanoma, Stage IV Melanoma          | I/II  | NewLink Genetics Corporation                                          | Indoximod (1-MT) | IDO1 inhibitor  | Ipilimumab                                                             | Open      | Jul-14 | NCT02073123                                                |
| Study of IDO Inhibitor in Combination With Gemcitabine and Nab-Paclitaxel in Patients With Metastatic Pancreatic Cancer                                                                                                                                                             | Metastatic Pancreatic Adenocarcinoma, Metastatic Pancreatic Cancer  | I/II  | NewLink Genetics Corporation                                          | Indoximod (1-MT) | IDO1 inhibitor  | Nab-Paclitaxel, Gemcitabine                                            | Open      | Aug-14 | NCT02077881                                                |
| Indoleamine-2,3-dioxygenase (IDO) Inhibition With INCB024360 and Intraperitoneal Delivery of Allogeneic Natural Killer Cells for Women With Recurrent Ovarian, Fallopian Tube, and Primary Peritoneal Cancer                                                                        | Recurrent Ovarian, Fallopian Tube, and Primary Peritoneal Cancer    | I     | Incyte University of Minnesota Cancer Center                          | INCB-24360       | IDO-1 inhibitor | CD3/CD19 natural killer cells, IL-2, Cyclophosphamide fludarabine (IV) | Open      | Apr-14 | NCT02118285                                                |
| A Phase I/IIb Study of DEC205mAb-NY-ESO-1 Fusion Protein (CDX-1401) Given With Adjuvant Poly-ICLC in Combination With INCB024360 for Patients in Remission With Epithelial Ovarian, Fallopian Tube, or Primary Peritoneal Carcinoma Whose Tumors Express NY-ESO-1 or LAGE-1 Antigen | Ovarian, Fallopian Tube, or Primary Peritoneal Cancer in Remission  | I/IIb | National Institutes of Health (NIH)/NCI Roswell Park Cancer Institute | INCB-24360       | IDO-1 inhibitor | DEC-205/NY-ESO-1 Fusion Protein CDX-1401, poly-ICLC                    | Open      | Aug-14 | NCT02166905                                                |
| Phase I/II study of the efficacy and safety of MEDI4736 in combination with INCB24360 in solid tumors                                                                                                                                                                               | Head/Neck Lung, Non-Small Cell Melanoma Pancreas                    | I/II  | AstraZeneca/MedImmune Incyte                                          | INCB-24360       | IDO-1 inhibitor | Durvalumab                                                             | Planned   | Dec-14 | Incyte & AstraZeneca/MedImmune press releases; NCT02318277 |
| A Phase I, Open-Label, Dose-Escalation Study to Determine the Safety, Tolerability, Pharmacokinetics and Pharmacodynamics of INCB024360 in Patients With Advanced Malignancies                                                                                                      | Advanced Malignancies                                               | I/II  | Incyte Corporation                                                    | INCB-24360       | IDO-1 inhibitor |                                                                        | Completed | Jul-14 | Newton, 2012 <sup>1</sup> ; NCT01195311                    |

|                                                                                                                                                                                                                                                                                      |                                                                                                           |      |                                                                                |            |                 |                       |         |         |                                            |
|--------------------------------------------------------------------------------------------------------------------------------------------------------------------------------------------------------------------------------------------------------------------------------------|-----------------------------------------------------------------------------------------------------------|------|--------------------------------------------------------------------------------|------------|-----------------|-----------------------|---------|---------|--------------------------------------------|
| A Phase I/II Randomized, Blinded, Placebo Controlled Study of Ipilimumab in Combination With INCB024360 or Placebo in Subjects With Unresectable or Metastatic Melanoma                                                                                                              | Metastatic Melanoma                                                                                       | I/II | Incyte Corporation                                                             | INCB-24360 | IDO-1 inhibitor | ipilimumab            | Open    | Mar-12  | Gibney <sup>2</sup> ; NCT01604889          |
| A Randomized, Open-label, Phase II study of the IDO inhibitor INCB024360 versus Tamoxifen for subjects with biochemical-recurrent -only epithelial ovarian cancer, primary peritoneal carcinoma, or fallopian tube cancer following complete remission with first-line chemotherapy. | Biochemical-recurrent Only Epithelial Ovarian Cancer, Primary Peritoneal Carcinoma, Fallopian Tube Cancer | II   | Incyte Corporation                                                             | INCB-24360 | IDO-1 inhibitor | Tamoxifen             | Closed  | Aug-12  | Incyte press releases; NCT01685255         |
| A Phase II Study to Determine the Safety and Efficacy of INCB024360 in Patients with Myelodysplastic Syndromes                                                                                                                                                                       | Myelodysplastic Syndrome                                                                                  | II   | H. Lee Moffitt Cancer Center and Research Institute Incyte                     | INCB-24360 | IDO-1 inhibitor |                       | Closed  | Jul-12  | Incyte press releases; NCT01822691         |
| A Pilot Study of the Immunological Effects of Neo-adjuvant INCB024360 in Patients With Epithelial Ovarian, Fallopian Tube or Primary Peritoneal Carcinoma                                                                                                                            | Newly Diagnosed Stage III-IV Epithelial Ovarian, Fallopian Tube, or Primary Peritoneal Cancer             | II   | NIH/NCI                                                                        | INCB-24360 | IDO-1 inhibitor | Surgical intervention | Open    | Dec-12  | NCT02042430                                |
| A Phase II Pilot Trial of an Indoleamine 2,3, Dioxygenase-1 (IDO1) Inhibitor (INCB024360) Plus a Muropeptide Melanoma Vaccine (MELITAC 12.1) in Patients With Advanced Melanoma                                                                                                      | Melanoma                                                                                                  | II   | Fred Hutchinson Cancer Research Center, Incyte, NIH/NCI University of Virginia | INCB-24360 | IDO-1 inhibitor | MELITAC 12.1          | Open    | Sept-12 | Incyte press releases; NCT01961115         |
| A Phase I/II Study of Nivolumab in Combination with INCB24360 in Patients with Multiple Tumor Types                                                                                                                                                                                  | Multiple Tumor Types                                                                                      | I/II | Bristol-Myers Squibb Incyte                                                    | INCB-24360 | IDO-1 inhibitor | nivolumab             | Planned | Dec-14  | Incyte press releases; TrialTrove          |
| A Phase I/II Study Exploring the Safety, Tolerability, and Efficacy of MK-3475 in Combination With INCB024360 in Subjects With Selected Solid Tumors (Phase I) Followed by a Randomized, Double-Blind, Placebo-Controlled Study in Subjects With Advanced NSCLC (Phase II)           | Cancer, Solid Tumor; Phase II will include patients with advanced NSC                                     | I/II | Incyte Merck & Co.                                                             | INCB-24360 | IDO-1 inhibitor | pembrolizumab         | Open    | June-14 | Incyte & Merck press releases; NCT02178722 |

|                                                                                                                                                                                                     |                                                                 |    |                                                                   |                                                      |                                |                                                     |                           |         |                                           |
|-----------------------------------------------------------------------------------------------------------------------------------------------------------------------------------------------------|-----------------------------------------------------------------|----|-------------------------------------------------------------------|------------------------------------------------------|--------------------------------|-----------------------------------------------------|---------------------------|---------|-------------------------------------------|
| A Safety, Tolerability and Efficacy Study of INCB24360 in Combination with MPDL3280A in Patients with Non-Small Cell Lung Cancer                                                                    | Lung, Non-Small Cell                                            | II | Incyte Roche/Genentech                                            | INCB-24360                                           | IDO-1 inhibitor                | MPDL3280A                                           | Planned                   |         | Incyte press releases; NCT02298153        |
| A Phase I Study of NLG-919 for Adult Patients with Recurrent Advanced Solid Tumors                                                                                                                  | Breast, Lung, Non-Small Cell, Pancreas, Unspecified Solid Tumor | I  | NewLink Genetics                                                  | NLG-919                                              | IDO-1 inhibitor                |                                                     | Open                      | Dec-13  | Khleif <sup>3</sup> , 2014; NCT02048709   |
| Phase I Multiple-Dose Safety, Pharmacokinetic and Pharmacodynamic Clinical Study of Nitric Oxide Releasing Aspirin (NCX 4016)                                                                       | Colorectal Cancer                                               | I  | Stony Brook University NCI                                        | NCX 4016                                             | arginase I/iNOS dual inhibitor |                                                     | Completed                 | Jul-06  | NCT00331786                               |
| Phase I Trial of Chemoimmunotherapy and Hypofractionated Radiation Therapy for Borderline Resectable and Locally Advanced Pancreatic Adenocarcinoma                                                 | Pancreas                                                        | I  | Providence Health & Services / Eli Lilly and Company              | Gemcitabine-HCl radiation therapy tadalafil (tablet) | PDE 5 inhibitor                | Surgical intervention                               | Closed                    | Jul-13- | NCT01903083                               |
| Exploratory Trial of Immunochemoradiotherapy for Locally Advanced Pancreatic Adenocarcinoma                                                                                                         | Pancreas                                                        | I  | Providence Health & Services / Earle A. Chiles Research Institute | GV-1001 (ID) sargramostim (ID) tadalafil             | PDE 5 inhibitor                | Gemcitabine radiation therapy surgical intervention | Closed                    | Jan-11  | Crocenzi <sup>4</sup> , 2013; NCT01342224 |
| Randomized Phase II Study of Autologous Stem Cell Transplantation With Tadalafil and Lenalidomide Maintenance With or Without Activated Marrow Infiltrating Lymphocytes (MILs) in High Risk Myeloma | Multiple Myeloma                                                | II | Sidney Kimmel Comprehensive Cancer Center at Johns Hopkins        | Activated infiltrating lymphocytes, tadalafil        | PDE 5 inhibitor                | Prevnar vaccine                                     | Open                      | Sept-13 | Johns Hopkins press releases; NCT01858558 |
| Pilot Study of Phosphodiesterase-5 Inhibitor Tadalafil (Cialis) as an Immunomodulator in Patients With Oral Cavity and Oropharyngeal Squamous Cell Carcinoma                                        | Head/Neck                                                       | II | Sylvester Cancer Center, University of Miami                      | Tadalafil                                            | PDE 5 inhibitor                | Surgical intervention                               | Closed, results published | Sept-08 | Weed <sup>5</sup> , 2015; NCT00843635     |
| Administration of an Oral PDE5 Inhibitor, Tadalafil in Conjunction With Lenalidomide and Dexamethasone in Patients With Multiple Myeloma                                                            | Multiple Myeloma                                                | II |                                                                   | Tadalafil (tablet)                                   | PDE 5 inhibitor                | Clarithromycin, Abbott dexamethasone lenalidomide   | Terminated                | Mar-12  | Ghosh <sup>6</sup> , 2013; NCT01374217    |

|                                                                                                                                                                                                                                              |                                                                                 |    |                                                                                                    |                                    |                 |                                                   |                           |        |                                           |
|----------------------------------------------------------------------------------------------------------------------------------------------------------------------------------------------------------------------------------------------|---------------------------------------------------------------------------------|----|----------------------------------------------------------------------------------------------------|------------------------------------|-----------------|---------------------------------------------------|---------------------------|--------|-------------------------------------------|
| A Phase II Trial of Tadalafil in Patients With Squamous Cell Carcinoma of the Upper Aero Digestive Tract                                                                                                                                     | Head/Neck                                                                       | II | Sidney Kimmel Comprehensive Cancer Center / National Institute of Dental and Craniofacial Research | tadalafil (tablet)                 | PDE 5 inhibitor | Undisclosed chemotherapy                          | Closed, results published | Jan-09 | Califano <sup>7</sup> , 2015; NCT00894413 |
| A Pilot Study to Determine the Safety of the Combination of Stable-Emulsion Formulation of Glucopyranosyl Lipid A (GLA-SE) with Radiation in Patients with Metastatic Sarcoma                                                                | Soft Tissue Sarcoma                                                             | I  | Fred Hutchinson Cancer Research Center / NCI                                                       | GLA                                | TLR4            | Radiation therapy                                 | Open                      | Oct-14 | NCT02180698                               |
| Phase One Study With Direct Individual Benefit: Effects of OM-174 in Adult Patients With Solid Tumors                                                                                                                                        | Solid tumors                                                                    | I  | Centre Hospitalier Universitaire Dijon                                                             | OM-174                             | TLR4            |                                                   | Completed                 | Mar-07 | Isambert <sup>8</sup> , 2013; NCT01800812 |
| Pilot Phase II, Open Label, Multicenter, Efficacy and Safety Study of 852A Administered Intravenously to Subjects With Unresectable Metastatic Cutaneous Melanoma                                                                            | Unresectable Metastatic Cutaneous Melanoma                                      | II | Pfizer                                                                                             | 852A <sup>†</sup>                  | TLR7            |                                                   | Completed                 | Feb-05 | NCT00189332                               |
| A Randomized, Double-Blind, Placebo-Controlled Study of Chemotherapy Plus Cetuximab in Combination With VTX 2337 in Patients With Recurrent or Metastatic Squamous Cell Carcinoma of the Head and Neck                                       | Carcinoma, Squamous Cell of Head and Neck                                       | II | VentiRx Pharmaceuticals Inc                                                                        | VTX-2337 <sup>*</sup>              | TLR8            | Cetuximab, Carboplatin, Cisplatin, 5-fluorouracil | Open                      | Jul-13 | NCT01836029                               |
| A Randomized, Double-Blind, Placebo-Controlled Phase II Study of VTX-2337 in Combination With Pegylated Liposomal Doxorubicin (PLD) in Patients With Recurrent or Persistent Epithelial Ovarian, Fallopian Tube or Primary Peritoneal Cancer | Epithelial Ovarian Cancer<br>Fallopian Tube Cancer<br>Primary Peritoneal Cancer | II | VentiRx Pharmaceuticals Inc.<br>Gynecologic Oncology Group                                         | VTX-2337 <sup>*</sup>              | TLR8            | Pegylated liposomal doxorubicin                   | Open                      | Oct-12 | NCT01666444                               |
| Open-Label Phase I b Study of Erlotinib Plus Bevacizumab and IMO-2055 in Patients With Non-Small Cell Lung Cancer Who Have Progressed Following Initial Chemotherapy for Advanced or Metastatic Disease                                      | Lung, Non-Small Cell                                                            | I  | Idera Pharmaceuticals<br>Merck KGaA/EMD Serono                                                     | IMO-2055 (EMD1201081) <sup>#</sup> | TLR9            | Bevacizumab erlotinib                             | Completed                 | Nov-07 | Smith <sup>9</sup> , 2014; NCT00633529    |

|                                                                                                                                                                                                                                                            |                                             |      |                                                                                              |                                    |       |                                                                |           |         |                                                   |
|------------------------------------------------------------------------------------------------------------------------------------------------------------------------------------------------------------------------------------------------------------|---------------------------------------------|------|----------------------------------------------------------------------------------------------|------------------------------------|-------|----------------------------------------------------------------|-----------|---------|---------------------------------------------------|
| A Phase II, Multi-Center, Randomized, Open-Label Study of Two Dose Levels of IMOxine (IMO-2055 for Injection) in Patients With Metastatic or Locally Recurrent Clear Cell Renal Carcinoma.                                                                 | Renal Cell Carcinoma                        | II   | Idera Pharmaceuticals                                                                        | IMO-2055 (EMD1201081) <sup>#</sup> | TLR9  |                                                                | Completed | Oct-04  | Idera Pharmaceuticals press releases; NCT00729053 |
| A Phase II, Open-label, 1:1 Randomized, Controlled Trial Exploring the Efficacy of EMD 1201081 in Combination With Cetuximab in Second-Line Cetuximab-Naive Subjects With Recurrent or Metastatic Squamous Cell Carcinoma of the Head and Neck (R/M SCCHN) | Head/Neck                                   | II   | Bayer AG Idera Pharmaceuticals Merck & Co./Merck Sharp & Dohme (MSD) Merck KGaA/Merck Serono | IMO-2055 (EMD1201081) <sup>†</sup> | TLR9  | Cetuximab                                                      | Completed | Dec-09  | Ruzsa <sup>10</sup> , 2014; NCT01040832           |
| A Phase I/II Study of Intratumoral Injection of SD-101, an Immunostimulatory CpG, and Intratumoral Injection of Ipilimumab, an Anti-CTLA4 Monoclonal Antibody, in Combination With Local Radiation in Low-Grade B-Cell Lymphomas                           | Lymphoma, Non-Hodgkin's                     | I/II | National Institutes of Health/National Cancer Institute Stanford University Medical Center   | SD-101                             | TLR9  | Radiation therapy, ipilimumab                                  | Open      | Sept-14 | Dynavax press releases; NCT02254772               |
| Intratumoral Injection of an Immunostimulatory CpG, SD-101, Combined With Local Radiation for the Treatment of Recurrent or Progressive Lymphoma After Allogeneic Hematopoietic Cell Transplantation                                                       | Lymphoma, Hodgkin's Lymphoma, Non-Hodgkin's | I    | Stanford University Medical Center                                                           | SD-101                             | TLR9  | Radiation therapy                                              | Open      | Aug-08  | Stanford press releases; NCT01745354              |
| A Phase 1/2, Non-randomized, Open-label, Multicenter, Dose Escalation and Expansion Study of Intratumoral Injections of SD-101 in Combination With Localized Low-dose Radiation in Patients With Untreated Low-grade B-cell Lymphoma                       | B-cell Lymphoma                             | I/II | Dynavax Technologies Corporation                                                             | SD-101                             | TLR9  | Radiation therapy                                              | Open      | Oct-14  | NCT02266147                                       |
| A Single Arm, Preoperative, Pilot Study to Evaluate the Safety and Biological Effects of Orally Administered Reparixin in Early Breast Cancer Patients Who Are Candidates for Surgery                                                                      | Breast Cancer                               | II   | Dompe Farmaceutici                                                                           | Reparixin/H Y-15251                | CXCR2 |                                                                | Open      | Feb-13  | NCT01861054                                       |
| Phase IB Study of FOLFIRINOX Plus PF-04136309 in Patients With Borderline Resectable and Locally Advanced Pancreatic Adenocarcinoma                                                                                                                        | Pancreatic Neoplasms                        | IB   | Washington University School of Medicine / NCI                                               | PF-04136309                        | CCR2  | FOLFIRINOX (Oxaliplatin, Irinotecan, Leucovorin, Fluorouracil) | Open      | Apr-12  | NCT01413022                                       |

|                                                                                                                                                                    |                              |       |                                      |                 |                 |                                |      |        |             |
|--------------------------------------------------------------------------------------------------------------------------------------------------------------------|------------------------------|-------|--------------------------------------|-----------------|-----------------|--------------------------------|------|--------|-------------|
| Phase 1 Study to Determine the Immunomodulatory Activity of LY2157299 Monohydrate in Patients With Solid Tumors                                                    | Neoplasm                     | I     | Eli Lilly and Company                | LY2157299<br>** | ALK5 inhibitor  |                                | Open | Dec-14 | NCT02304419 |
| First-in-Human Dose-Escalation Study of TEW-7197 Monotherapy in Subjects With Advanced Stage Solid Tumors                                                          | Advanced Stage Solid Tumors  | I     | MedPacto, Inc./ National OncoVenture | EW-7179         | ALK5 inhibitor  |                                | Open | Jun-14 | NCT02160106 |
| An Open Label Phase 1b/2 Study of Orally Administered PLX3397 in Combination With Radiation Therapy and Temozolomide in Patients With Newly Diagnosed Glioblastoma | Newly Diagnosed Glioblastoma | IB/II | Plexxikon                            | PLX3397§        | CSF-1 inhibitor | Radiation Therapy Temozolomide | Open | Aug-13 | NCT01790503 |

In the selection of agents included in this table we have endeavored to select those clinical trials for which the drug is being evaluated for its ability to stimulate the immune response or reverse immune tolerance to treat malignancies. For trials which do not appear criteria or for which the agent is being employed as an adjuvant in a vaccine, we have chosen to list the additional trial numbers at the end of the table.

\* Only the largest two trials are listed for VTX-2337. There are 5 additional smaller trials listed for VTX-2337 in [clinicaltrials.gov](http://clinicaltrials.gov)- NCT01334177, NCT01289210, NCT00688415, NCT01294293, NCT02124850

† Listed for IMO-2055 (HYB2055, EMD1201081). There are 2 additional smaller trials listed for IMO-2055 in [clinicaltrials.gov](http://clinicaltrials.gov) (NCT00719199, NCT01360827) and two publications of early trial results, Hwang, 2004 and Sullivan, 2004.

‡ Listed is a Phase II trial by Pfizer for 852A. There are 5 additional trials listed for 852A in [clinicaltrials.gov](http://clinicaltrials.gov)- NCT00276159, NCT00319748, NCT00095160, NCT00386594, NCT00091689

§ Trial listed for PLX3397 in GBM with in line with data from Pyontek, 2013. There are 10 additional cancer trials listed for PLX3397 in [clinicaltrials.gov](http://clinicaltrials.gov)- NCT01525602, NCT02071940, NCT01596751, NCT01499043, NCT01826448, NCT01349049, NCT01090570, NCT01349036, NCT01217229, NCT01004861

\*\* There are 12 additional trials listed for LY2157299 in [clinicaltrials.gov](http://clinicaltrials.gov) - NCT02240433, NCT02154646, NCT01965808, NCT01746004, - NCT01722825, NCT02178358, NCT02008318, NCT01246986, NCT01220271, NCT01582269, NCT01373164, NCT01682187.

## References

1. Robert Charles Newton, P.A.S., Kevin Bowman, Xiangdong Liu, Gregory Lawrence Beatty, Peter J O'Dwyer, Thomas Gajewski, Jill Bowman, Richard Schaub, Lance Leopold. Pharmacodynamic assessment of INCB024360, an inhibitor of indoleamine 2,3-dioxygenase 1 (IDO1), in advanced cancer patients. *J Clin Oncol* **30** (2012).
2. Geoffrey T. Gibney, O.H., Tara C. Gangadhar, Jose Lutzky, Anthony J. Olszanski, Thomas F. Gajewski, Bartosz Chmielowski, Peter D. Boasberg, Yufan Zhao, Robert C. Newton, Peggy A. Scherle, Jill Bowman, Janet Maleski, Lance Leopold, Jeffrey S. Weber. Preliminary Results From a Phase 1/2 Study of INCB024360 Combined With Ipilimumab in Patients With Melanoma. *2014 Annual Meeting of the American Society of Clinical Oncology Poster # 3010* (2014).
3. Samir Khleif, D.M., Asha Nyak-Kapoor, Mario R. Mautino, Eugene Kennedy, Nicholas N. Vahanian, Charles J. Link. First-in-human phase 1 study of the novel indoleamine-2,3-dioxygenase (IDO) inhibitor NLG-919. *J Clin Oncol* **32**, 2014 ASCO Annual Meeting abstr TPS3121 (2014).
4. Todd S. Crocenzi, M.C., Ronald Wolf, Chet Hammill, Pippa Newell, Alan Savoy, Lehel Somogyi, Michael Phillips, James Regan, Michael Owens, Matthew C. Solhjem, Steven Seung, Anupama Kurup, Shane Orion Rogosin, Walter John Urba, Carlo Bruno Bifulco, Xiaohong Cai, Alexandru Bageac and Michael Gough. An exploratory phase I trial of immunochemoradiotherapy in locally advanced and borderline resectable (LA/BR) pancreatic adenocarcinoma (PC). *Journal of Clinical Oncology* **31**, ASCO abstract # 174 (2013).
5. Weed, D.T. et al. Tadalafil Reduces Myeloid-Derived Suppressor Cells and Regulatory T Cells and Promotes Tumor Immunity in Patients with Head and Neck Squamous Cell Carcinoma. *Clinical Cancer Research* **21**, 39-48 (2015).
6. Ghosh, N. et al. Administration Of An Oral PDE5 Inhibitor, Tadalafil In Conjunction With a Lenalidomide Containing Regimen In Patients With Multiple Myeloma. *Blood* **122**, 1959-1959 (2013).
7. Califano, J.A. et al. Tadalafil Augments Tumor Specific Immunity in Patients with Head and Neck Squamous Cell Carcinoma. *Clinical Cancer Research* **21**, 30-38 (2015).
8. Isambert, N. et al. Phase I study of OM-174, a lipid A analogue, with assessment of immunological response, in patients with refractory solid tumors. *BMC Cancer* **13** (2013).
9. Smith, D.A. et al. Antitumor activity and safety of combination therapy with the Toll-like receptor 9 agonist IMO-2055, erlotinib, and bevacizumab in advanced or metastatic non-small cell lung cancer patients who have progressed following chemotherapy. *Cancer Immunology, Immunotherapy* **63**, 787-796 (2014).
10. Ruzsa, A. et al. Phase 2, open-label, 1:1 randomized controlled trial exploring the efficacy of EMD 1201081 in combination with cetuximab in second-line cetuximab-naïve patients with recurrent or metastatic squamous cell carcinoma of the head and neck (R/M SCCHN). *Investigational New Drugs* **32**, 1278-1284 (2014).
